# Supplementary material
Source: PubMed Central journal article supplement (PMC7551219)
Supplement: jamapediatr-e203352-s001.pdf [file jamapediatr-e203352-s001.pdf]

## Supplementary Online Content

McCabe SE, Arterberry BJ, Dickinson K, et al. Assessment of changes in alcohol and marijuana abstinence, co-use, and use disorders among US young adults from 2002 to 2018. *JAMA Pediatr*. Published online October 12, 2020. doi:10.1001/jamapediatrics.2020.3352

**eTable 1.** Trends in Demographic Characteristics Among US Young Adults Aged 18-22 Years Old: 2002-2018

**eTable 2.** Cumulative Percentage of Prescription and Illicit Drug Use as a Function of Alcohol or Marijuana Involvement in US Young Adults: 2015-2018

This supplementary material has been provided by the authors to give readers additional information about their work.

eTable 1. Trends in demographic characteristics among US young adults aged 18-22 years old: 2002-2018

| <b>Weighted</b>       | <b>2002 (%)</b> | <b>2003 (%)</b> | <b>2004 (%)</b> | <b>2005 (%)</b> | <b>2006 (%)</b> | <b>2007 (%)</b> | <b>2008 (%)</b> | <b>2009 (%)</b> | <b>2010 (%)</b> | <b>2011 (%)</b> | <b>2012 (%)</b> | <b>2013 (%)</b> | <b>2014 (%)</b> | <b>2015 (%)</b> | <b>2016 (%)</b> | <b>2017 (%)</b> | <b>2018 (%)</b> | <b>Annualized Trend %</b> |  |
|-----------------------|-----------------|-----------------|-----------------|-----------------|-----------------|-----------------|-----------------|-----------------|-----------------|-----------------|-----------------|-----------------|-----------------|-----------------|-----------------|-----------------|-----------------|---------------------------|--|
| Unweighted Sample (n) | 11,334          | 11,701          | 11,879          | 11,796          | 11,313          | 11,562          | 12,117          | 12,050          | 12,212          | 12,254          | 11,649          | 11,244          | 8,074           | 8,760           | 8,209           | 8,238           | 8,380           |                           |  |
| Sex                   |                 |                 |                 |                 |                 |                 |                 |                 |                 |                 |                 |                 |                 |                 |                 |                 |                 |                           |  |
| Male                  | 50.9            | 50.4            | 50.7            | 51.0            | 51.9            | 51.4            | 50.7            | 51.4            | 51.9            | 50.6            | 50.6            | 51.2            | 51.5            | 50.8            | 51.4            | 51.3            | 51.2            |                           |  |
| Female                | 49.2            | 49.6            | 49.3            | 49.0            | 48.1            | 48.7            | 49.3            | 48.6            | 48.1            | 49.5            | 49.4            | 48.8            | 48.5            | 49.2            | 48.6            | 48.7            | 48.8            | <-0.01 (-0.01,0.05)       |  |
| Race/Ethnicity        |                 |                 |                 |                 |                 |                 |                 |                 |                 |                 |                 |                 |                 |                 |                 |                 |                 |                           |  |
| Asian                 | 3.9             | 4.4             | 4.4             | 4.4             | 4.7             | 4.3             | 4.4             | 4.0             | 4.1             | 4.9             | 5.1             | 5.4             | 5.6             | 5.6             | 6.0             | 6.0             | 6.5             | 0.14 (0.10,0.18)          |  |
| Black                 | 13.7            | 14.3            | 13.5            | 13.9            | 13.6            | 14.1            | 14.9            | 14.6            | 14.4            | 14.4            | 14.3            | 14.3            | 14.6            | 14.5            | 14.2            | 14.2            | 13.8            | 0.03 (-0.04,0.08)         |  |
| Hispanic              | 17.3            | 17.1            | 17.5            | 17.3            | 17.2            | 17.4            | 17.9            | 18.2            | 19.3            | 21.5            | 20.9            | 21.6            | 21.8            | 21.8            | 22.2            | 22.6            | 22.4            | 0.43 (0.35,0.51)          |  |
| White                 | 62.5            | 62.0            | 62.4            | 62.1            | 62.3            | 61.7            | 60.5            | 60.6            | 59.6            | 55.9            | 56.0            | 55.2            | 54.6            | 54.4            | 53.9            | 53.8            | 53.3            | -0.70 (-0.79,-0.60)       |  |
| Multiracial           | 1.4             | 1.2             | 1.2             | 1.2             | 1.1             | 1.6             | 1.4             | 1.5             | 1.6             | 2.2             | 2.5             | 2.3             | 2.4             | 2.6             | 2.4             | 2.7             | 2.3             | 0.11 (0.09,0.12)          |  |
| Other                 | 1.2             | 1               | 1               | 1.1             | 1.1             | 0.9             | 0.9             | 1.1             | 1               | 1.1             | 1.2             | 1.2             | 1               | 1.1             | 1.3             | 0.7             | 1.0             | <-0.01 (-0.01,0.01)       |  |
| Education             |                 |                 |                 |                 |                 |                 |                 |                 |                 |                 |                 |                 |                 |                 |                 |                 |                 |                           |  |
| In college            | 44.5            | 45.7            | 45.9            | 46.3            | 46.6            | 47.7            | 48.0            | 49.6            | 50.2            | 50.3            | 51.0            | 48.5            | 49.5            | 45.7            | 47.1            | 46.3            | 45.0            | 0.08 (-0.02,0.18)         |  |
| Non-college           | 44.9            | 44.2            | 44.7            | 44.0            | 43.3            | 42.1            | 42.3            | 40.5            | 39.1            | 39.4            | 38.9            | 41.1            | 40.0            | 43.3            | 42.0            | 42.7            | 43.6            | -0.16 (-0.24,-0.07)       |  |
| Other                 | 10.6            | 10.1            | 9.4             | 9.7             | 10.1            | 10.2            | 9.7             | 9.9             | 10.8            | 10.3            | 10.1            | 10.4            | 10.6            | 11.0            | 10.9            | 11.0            | 11.5            | 0.08 (0.04,0.12)          |  |

Source: U.S. Department of Health and Human Services, Substance Abuse and Mental Health Services Administration, Center for Behavioral Health Statistics and Quality. 2019. National Survey on Drug Use and Health 2002-2018 (NSDUH-2002-2018-DS0001). Retrieved from <https://datafiles.samhsa.gov/>. Accessed January 6, 2020.

eTable 2. Cumulative percentage of prescription and illicit drug use as a function of alcohol or marijuana involvement in US young adults: 2015-2018

|                                           | <b>Unweighted<br/>Sample<br/>Size</b> | <b>Sub-population of<br/>prescription drug<br/>use</b> | <b>Sub-population of<br/>prescription drug<br/>misuse</b> | <b>Sub-population of<br/>prescription drug<br/>use disorder</b> | <b>Sub-population of<br/>illicit drug<br/>use</b> | <b>Sub-population of<br/>illicit drug<br/>use disorder</b> |
|-------------------------------------------|---------------------------------------|--------------------------------------------------------|-----------------------------------------------------------|-----------------------------------------------------------------|---------------------------------------------------|------------------------------------------------------------|
|                                           | <b>(n)</b>                            | <b>(Cumulative %)</b>                                  | <b>(Cumulative %)</b>                                     | <b>(Cumulative %)</b>                                           | <b>(Cumulative %)</b>                             | <b>(Cumulative %)</b>                                      |
| <b>Alcohol and Marijuana: College</b>     |                                       |                                                        |                                                           |                                                                 |                                                   |                                                            |
| Abstinence of both                        | 3,739                                 | 15.3                                                   | 3.7                                                       | 6.6                                                             | 3.8                                               | 4.7                                                        |
| Non-disordered alcohol use                | 5,388                                 | 29.4                                                   | 14.2                                                      | 5.2                                                             | 13.1                                              | 5.9                                                        |
| Non-disordered marijuana use              | 209                                   | 1.6                                                    | 1.1                                                       | 0.4                                                             | 1.2                                               | 1.0                                                        |
| Non-disordered co-use                     | 3,378                                 | 30.3                                                   | 40.0                                                      | 19.5                                                            | 42.1                                              | 23.5                                                       |
| Alcohol use disorder                      | 1,231                                 | 12.9                                                   | 21.0                                                      | 27.4                                                            | 20.0                                              | 29.4                                                       |
| Marijuana use disorder                    | 497                                   | 6.5                                                    | 11.5                                                      | 12.6                                                            | 11.8                                              | 11.6                                                       |
| Disordered co-use                         | 268                                   | 3.9                                                    | 8.5                                                       | 28.3                                                            | 8.0                                               | 23.9                                                       |
| <b>Alcohol and Marijuana: Non-College</b> |                                       |                                                        |                                                           |                                                                 |                                                   |                                                            |
| Abstinence of both                        | 3,988                                 | 16.3                                                   | 5.2                                                       | 6.4                                                             | 5.0                                               | 4.4                                                        |
| Non-disordered alcohol use                | 5,269                                 | 30.3                                                   | 14.5                                                      | 9.2                                                             | 13.5                                              | 8.3                                                        |
| Non-disordered marijuana use              | 375                                   | 2.0                                                    | 2.4                                                       | 3.7                                                             | 2.4                                               | 2.9                                                        |
| Non-disordered co-use                     | 3,397                                 | 28.9                                                   | 38.2                                                      | 24.0                                                            | 41.1                                              | 28.5                                                       |
| Alcohol use disorder                      | 1,233                                 | 12.2                                                   | 20.1                                                      | 23.0                                                            | 18.6                                              | 22.8                                                       |
| Marijuana use disorder                    | 6,52                                  | 6.2                                                    | 11.1                                                      | 14.6                                                            | 11.3                                              | 15.1                                                       |
| Disordered co-use                         | 324                                   | 4.0                                                    | 8.5                                                       | 19.2                                                            | 8.1                                               | 18.0                                                       |
| <b>Alcohol and Marijuana: Overall</b>     |                                       |                                                        |                                                           |                                                                 |                                                   |                                                            |
| Abstinence of both                        | 7,727                                 | 17.5                                                   | 4.9                                                       | 7.3                                                             | 4.9                                               | 5.1                                                        |
| Non-disordered alcohol use                | 10,657                                | 29.1                                                   | 14.1                                                      | 7.4                                                             | 13.2                                              | 7.5                                                        |
| Non-disordered marijuana use              | 584                                   | 2.0                                                    | 1.8                                                       | 2.5                                                             | 1.9                                               | 2.3                                                        |
| Non-disordered co-use                     | 6,775                                 | 29.0                                                   | 38.9                                                      | 22.7                                                            | 41.3                                              | 26.7                                                       |
| Alcohol use disorder                      | 2,464                                 | 12.1                                                   | 20.1                                                      | 23.9                                                            | 18.9                                              | 24.4                                                       |
| Marijuana use disorder                    | 1,149                                 | 6.4                                                    | 11.6                                                      | 12.7                                                            | 11.7                                              | 13.3                                                       |
| Disordered co-use                         | 592                                   | 4.0                                                    | 8.7                                                       | 23.6                                                            | 8.2                                               | 20.7                                                       |

Source: U.S. Department of Health and Human Services, Substance Abuse and Mental Health Services Administration, Center for Behavioral Health Statistics and Quality. 2019. National Survey on Drug Use and Health 2002-2018 (NSDUH-2002-2018-DS0001). Retrieved from <https://datafiles.samhsa.gov/>. Accessed January 6, 2020.

Notes: Prescription drug refers to prescription opioids, prescription stimulants, and/or prescription sedatives/tranquilizers/anxiolytics. Other illicit drug use refers to heroin, cocaine, hallucinogen, inhalant, and methamphetamine. Cumulative percentage is weighted.
